# Supplementary material for: Interactions of graphene with oxidants in a mixed atmosphere: synergistic effects of O2/H2O and O2/CO2 on gasification reactivity and kinetics
Source: Royal Society of Chemistry journal article supplement (doi:10.1039/d4cp01166j), 2024-01-01
Supplement: d4cp01166j1.pdf [file d4cp01166j1.pdf]

## **Supplementary Information**

### **Interactions of graphene with oxidants in a mixed atmosphere: synergistic effects of O<sub>2</sub>/H<sub>2</sub>O and O<sub>2</sub>/CO<sub>2</sub> on gasification reactivity and kinetics**

Zeng Liang<sup>1</sup>, Rita Khanna<sup>2</sup>, Kejiang Li<sup>1\*</sup>, Yunfei Ma<sup>3</sup>, Yuri Konyukhov<sup>4</sup>, Yushan Bu<sup>1</sup>, Jianliang Zhang<sup>1</sup>, Alberto N. Conejo<sup>1</sup>

<sup>1</sup>School of Metallurgical and Ecological Engineering, University of Science and Technology Beijing, Beijing 100083, P.R. China.

<sup>2</sup>School of Materials Science and Engineering (ret.), The University of New South Wales, Sydney, NSW 2052, Australia

<sup>3</sup>School of Software Engineering, Xi'an Jiaotong University, Xi'an, 710049, PR China.

<sup>4</sup>Department of Functional Nanosystems and High-Temperature Materials, National University of Science and Technology "MISIS", Moscow, 119049, Russia.

**\*Corresponding author:** Kejiang Li

**Address:** 30 Xueyuan Rd., Haidian District, Beijing 100083, PR China.

**E-mail:** likejiang@ustb.edu.cn (Kejiang Li)

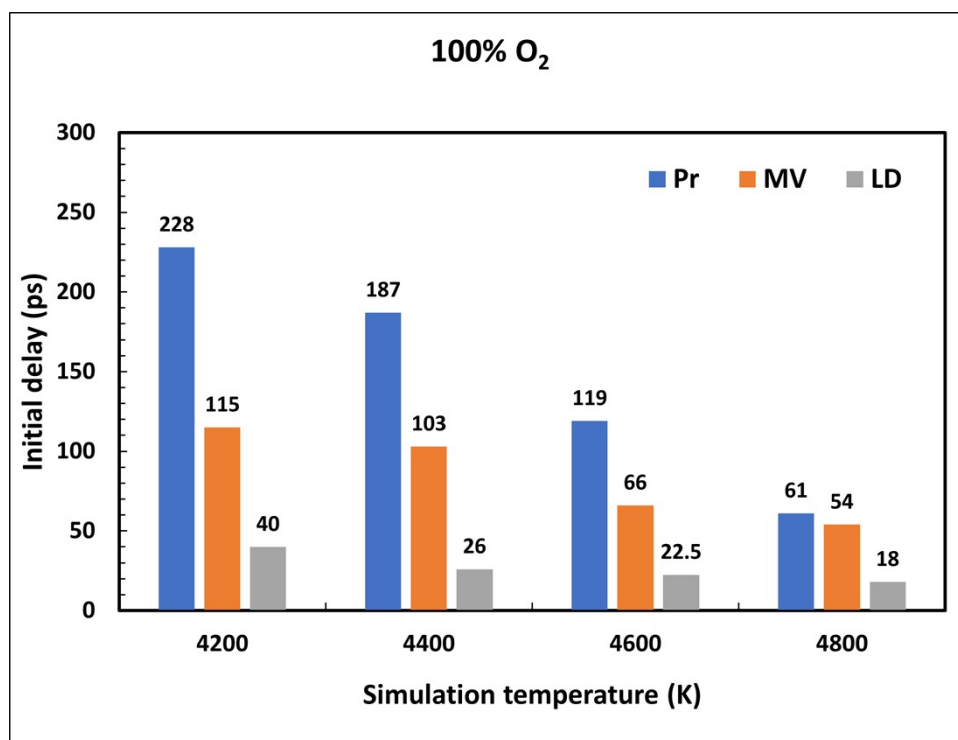

**Fig. S1.** Initial delays (ps) in carbon gasification of graphene under 100% O<sub>2</sub> environment. Data is provided for three graphene configurations: Pristine (Pr), Monovacant (MV) and line defect (LD) at a number of simulation temperatures.

**Table. S1.** Mixed Oxidant Composition. 13 groups of molecular number of the three gases(O<sub>2</sub>, CO<sub>2</sub>, H<sub>2</sub>O) in each volume ratio component

| <b>NO</b> | <b>O<sub>2</sub></b> | <b>CO<sub>2</sub></b> | <b>H<sub>2</sub>O</b> | <b>Cs</b>  | <b>C:O</b>  | <b>Remarks</b>                                     |
|-----------|----------------------|-----------------------|-----------------------|------------|-------------|----------------------------------------------------|
| <b>1</b>  | <b>0</b>             | <b>0</b>              | <b>800</b>            | <b>800</b> | <b>1</b>    | <b>100%<math>H_2O</math></b>                       |
| <b>2</b>  | <b>160</b>           | <b>0</b>              | <b>640</b>            | <b>800</b> | <b>5/6</b>  | <b>20%<math>O_2</math>:80%<math>H_2O</math></b>    |
| <b>3</b>  | <b>320</b>           | <b>0</b>              | <b>480</b>            | <b>800</b> | <b>5/7</b>  | <b>40%<math>O_2</math>:60%<math>H_2O</math></b>    |
| <b>4</b>  | <b>480</b>           | <b>0</b>              | <b>320</b>            | <b>800</b> | <b>5/8</b>  | <b>60%<math>O_2</math>:40%<math>H_2O</math></b>    |
| <b>5</b>  | <b>560</b>           | <b>0</b>              | <b>240</b>            | <b>800</b> | <b>0.59</b> | <b>70% <math>O_2</math>: 30% <math>H_2O</math></b> |
| <b>6</b>  | <b>640</b>           | <b>0</b>              | <b>160</b>            | <b>800</b> | <b>5/9</b>  | <b>80%<math>O_2</math>: 20%<math>H_2O</math></b>   |
| <b>7</b>  | <b>720</b>           | <b>0</b>              | <b>80</b>             | <b>800</b> | <b>0.53</b> | <b>90% <math>O_2</math>: 10% <math>H_2O</math></b> |
| <b>8</b>  | <b>0</b>             | <b>800</b>            | <b>0</b>              | <b>800</b> | <b>1</b>    | <b>100%<math>CO_2</math></b>                       |
| <b>9</b>  | <b>160</b>           | <b>640</b>            | <b>0</b>              | <b>800</b> | <b>8/9</b>  | <b>20%<math>O_2</math>:80%<math>CO_2</math></b>    |
| <b>10</b> | <b>320</b>           | <b>480</b>            | <b>0</b>              | <b>800</b> | <b>4/5</b>  | <b>40%<math>O_2</math>:60%<math>CO_2</math></b>    |
| <b>11</b> | <b>480</b>           | <b>320</b>            | <b>0</b>              | <b>800</b> | <b>2/3</b>  | <b>60%<math>O_2</math>:40%<math>CO_2</math></b>    |
| <b>12</b> | <b>640</b>           | <b>160</b>            | <b>0</b>              | <b>800</b> | <b>3/5</b>  | <b>80%<math>O_2</math>:20%<math>CO_2</math></b>    |
| <b>13</b> | <b>800</b>           | <b>0</b>              | <b>0</b>              | <b>800</b> | <b>1/2</b>  | <b>100%<math>O_2</math></b>                        |

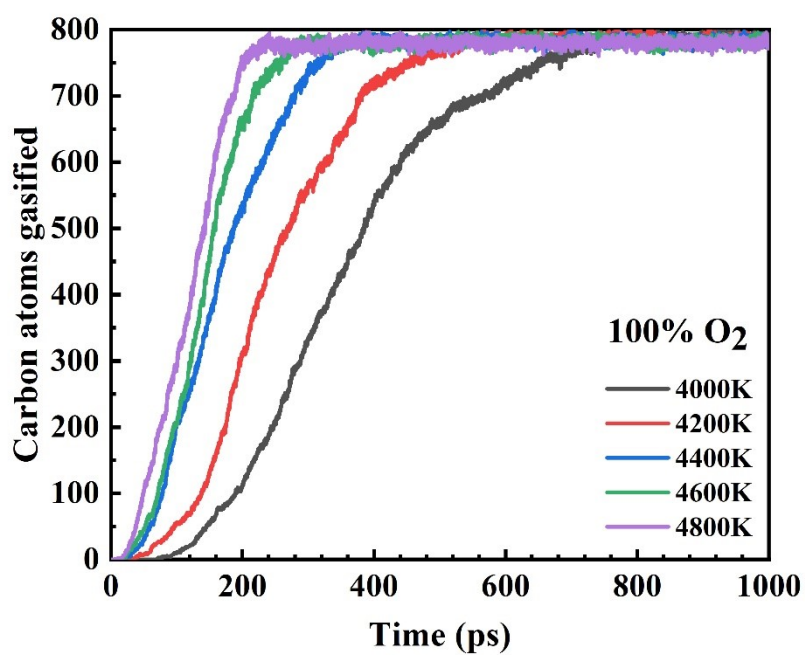

**Fig. S2.** Carbon gasification behavior of LD graphene under 100%O<sub>2</sub> at a range of temperatures.

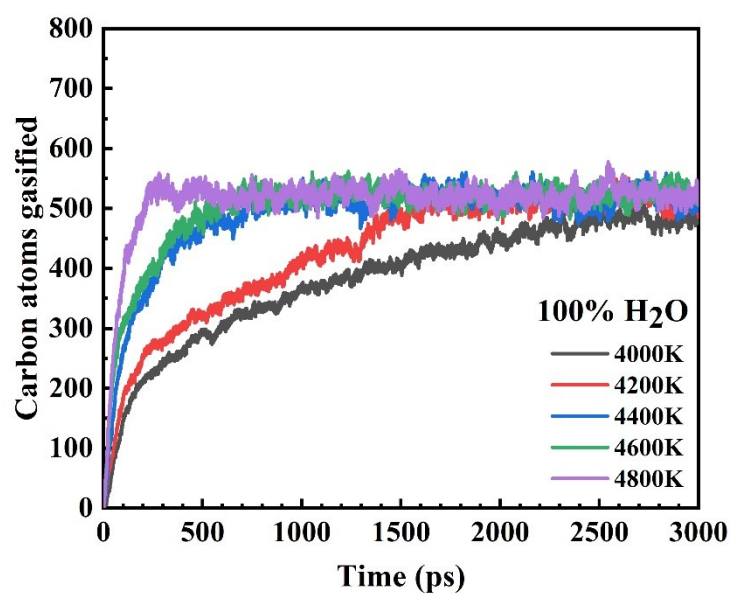

**Fig. S3.** Carbon gasification behavior of LD graphene under 100%H<sub>2</sub>O at a range of temperatures.

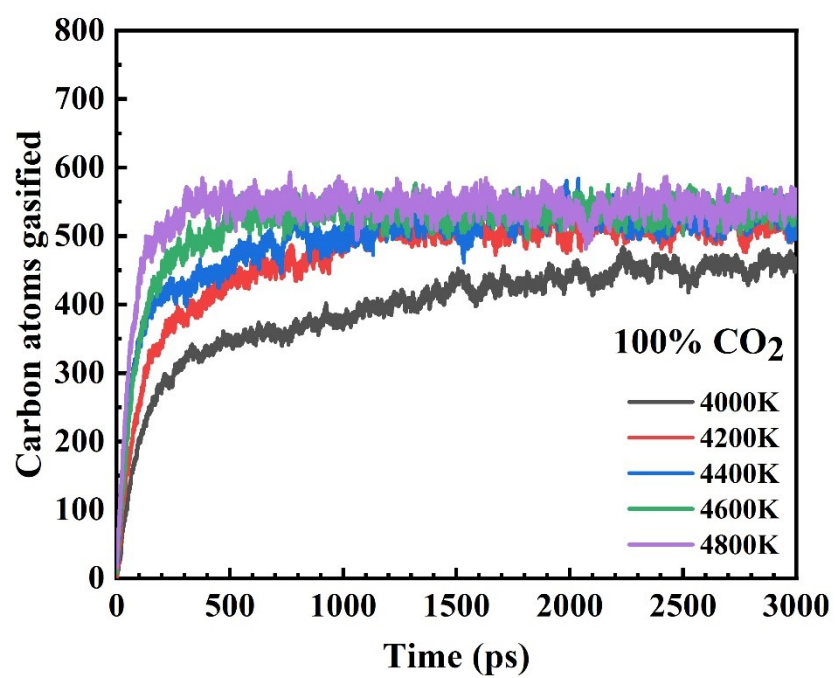

**Fig. S4.** Carbon gasification behavior of LD graphene under 100%CO<sub>2</sub> at a range of temperatures.

## ReaxFF parameters

nitramines (RDX/HMX/TATB/PETN))+DMNA-barrier+innervdWaa An, Qi, et al. The Journal of Physical Chemistry C 117.50 (2013): 26551-26561.

39 ! Number of general parameters  
50.0000 !Overcoordination parameter  
9.4514 !Overcoordination parameter  
29.8953 !Valency angle conjugation parameter  
216.5421 !Triple bond stabilisation parameter  
12.2245 !Triple bond stabilisation parameter  
0.0000 !C2-correction  
1.0701 !Undercoordination parameter  
7.5000 !Triple bond stabilisation parameter  
11.9083 !Undercoordination parameter  
13.3822 !Undercoordination parameter  
-10.9834 !Triple bond stabilization energy  
0.0000 !Lower Taper-radius  
10.0000 !Upper Taper-radius  
2.8793 !Not used  
33.8667 !Valency undercoordination  
3.3976 !Valency angle/lone pair parameter  
1.0563 !Valency angle  
2.0384 !Valency angle parameter  
6.1431 !Not used  
6.9290 !Double bond/angle parameter  
0.0283 !Double bond/angle parameter: overcoord  
0.0570 !Double bond/angle parameter: overcoord  
-2.4837 !Not used  
5.8374 !Torsion/BO parameter  
10.0000 !Torsion overcoordination  
1.8820 !Torsion overcoordination  
-1.2327 !Conjugation 0 (not used)  
2.1861 !Conjugation  
1.5591 !vdWaals shielding  
0.0100 !Cutoff for bond order (\*100)

4.8414 !Valency angle conjugation parameter  
 3.5857 !Overcoordination parameter  
 38.6472 !Overcoordination parameter  
 2.1533 !Valency/lone pair parameter  
 0.5000 !Not used  
 20.0000 !Not used  
 5.0000 !Molecular energy (not used)  
 0.0000 !Molecular energy (not used)  
 6.9784 !Valency angle conjugation parameter  
 7 !Nr of atoms; cov.r; valency;a.m;Rvdw;Evdw;gammaEEM;cov.r2;#  
     alfa;gammavdW;valency;Eunder;Eover;chiEEM;etaEEM;n.u.  
     cov r3;Elp;Heat inc.;n.u.;n.u.;n.u.;n.u.  
     ov/un;val1;n.u.;val3,vval4  
 C 1.3742 4.0000 12.0000 1.9684 0.1723 0.8712 1.2385 4.0000  
    8.7696 0.0000 4.0000 31.0823 79.5548 5.7254 6.9235 0.0000  
    1.2104 0.0000 183.8108 5.7419 33.3951 11.9957 0.8563 0.0000  
    -2.8983 4.7820 1.0564 4.0000 2.9663 1.6737 0.1421 14.0707  
 H 0.6867 1.0000 1.0080 1.3525 0.0616 0.8910 -0.1000 1.0000  
    9.1506 0.0000 1.0000 0.0000 121.1250 3.8446 10.0839 1.0000  
    -0.1000 0.0000 58.4369 3.8461 3.2540 1.0000 1.0698 0.0000  
    -15.7683 2.1504 1.0338 1.0000 2.8793 1.2669 0.0139 12.4538  
 O 1.3142 2.0000 15.9990 1.9741 0.0880 0.8712 1.1139 6.0000  
    9.9926 0.0000 4.0000 29.5271 116.0768 8.5000 7.1412 2.0000  
    0.9909 14.7235 69.2921 9.1371 1.6258 0.1863 0.9745 0.0000  
    -3.5965 2.5000 1.0493 4.0000 2.9225 1.7221 0.1670 13.9991  
 N 1.2456 3.0000 14.0000 2.0437 0.1035 0.8712 1.1911 5.0000  
    9.8823 0.0000 4.0000 32.4758 100.0000 6.8453 6.8349 2.0000  
    1.0636 0.0276 127.9672 2.2169 2.8632 2.4419 0.9745 0.0000  
    -4.0959 2.0047 1.0183 4.0000 2.8793 1.5967 0.1649 13.9888  
 S 1.9647 2.0000 32.0600 2.0783 0.2176 1.0336 1.5386 6.0000  
    9.9676 0.0000 4.0000 35.1648 112.1416 6.5000 8.2545 2.0000  
    1.4703 9.4922 70.0338 8.5146 28.0801 8.5010 0.9745 0.0000  
    -10.0773 2.7466 1.0338 6.2998 2.8793 1.8000 0.1000 14.0000  
 Si 1.9006 4.0000 28.0600 1.8610 0.2074 0.6295 1.2962 4.0000



12.2693 0.0000 4.0000 24.9985 139.9309 2.9124 7.4273 0.0000  
 1.2000 0.0000 128.2031 5.3697 18.4627 0.1712 0.8563 0.0000  
 -5.8495 2.2852 1.0338 4.0000 2.5791 1.8737 0.0421 12.0707  
 X -0.1000 2.0000 1.0080 2.0000 0.0000 1.0000 -0.1000 6.0000  
 10.0000 0.0000 4.0000 0.0000 0.0000 8.5000 1.5000 0.0000  
 -0.1000 0.0000 -2.3700 8.7410 13.3640 0.6690 0.9745 0.0000  
 -11.0000 2.7466 1.0338 4.0000 2.8793 1.6737 0.1421 14.0707  
 20 ! Nr of bonds; Edis1;LPpen;n.u.;pbe1;pbo5;13corr;pbo6  
     pbe2;pbo3;pbo4;Etrip;pbo1;pbo2;ovcorr  
 1 1 141.9346 113.4487 67.6027 0.1554 -0.3045 1.0000 30.4515 0.4283  
     0.0801 -0.2113 8.5395 1.0000 -0.0933 6.6967 1.0000 0.0000  
 1 2 163.6889 0.0000 0.0000 -0.4525 0.0000 1.0000 6.0000 0.5921  
     12.1053 1.0000 0.0000 1.0000 -0.0097 8.6351 0.0000 0.0000  
 2 2 169.8421 0.0000 0.0000 -0.3591 0.0000 1.0000 6.0000 0.7503  
     9.3119 1.0000 0.0000 1.0000 -0.0169 5.9406 0.0000 0.0000  
 1 3 159.7219 116.8921 77.9315 -0.4324 -0.1742 1.0000 15.0019 0.5160  
     1.2934 -0.3079 7.0252 1.0000 -0.1543 4.5116 0.0000 0.0000  
 3 3 108.9631 158.3501 42.0558 0.1226 -0.1324 1.0000 28.5716 0.2545  
     1.0000 -0.2656 8.6489 1.0000 -0.1000 6.8482 1.0000 0.0000  
 1 4 128.9104 171.2945 100.5836 -0.1306 -0.4948 1.0000 26.7458 0.4489  
     0.3746 -0.3549 7.0000 1.0000 -0.1248 4.9232 1.0000 0.0000  
 3 4 85.0402 118.8680 75.7263 0.7080 -0.1062 1.0000 16.6913 0.2407  
     0.3535 -0.1906 8.4054 1.0000 -0.1154 5.6575 1.0000 0.0000  
 4 4 160.6599 73.3721 154.2849 -0.7107 -0.1462 1.0000 12.0000 0.6826  
     0.9330 -0.1434 10.6712 1.0000 -0.0890 4.6486 1.0000 0.0000  
 2 3 219.7016 0.0000 0.0000 -0.6643 0.0000 1.0000 6.0000 0.9854  
     5.1146 1.0000 0.0000 1.0000 -0.0532 5.1189 0.0000 0.0000  
 2 4 208.0443 0.0000 0.0000 -0.3923 0.0000 1.0000 6.0000 0.3221  
     10.5505 1.0000 0.0000 1.0000 -0.0690 6.2949 0.0000 0.0000  
 1 5 128.7959 56.4134 39.0716 0.0688 -0.4463 1.0000 31.1766 0.4530  
     0.1955 -0.3587 6.2148 1.0000 -0.0770 6.6386 1.0000 0.0000  
 2 5 128.6090 0.0000 0.0000 -0.5555 0.0000 1.0000 6.0000 0.4721  
     10.8735 1.0000 0.0000 1.0000 -0.0242 9.1937 1.0000 0.0000  
 3 5 0.0000 0.0000 0.0000 0.5563 -0.4038 1.0000 49.5611 0.6000

0.4259 -0.4577 12.7569 1.0000 -0.1100 7.1145 1.0000 0.0000  
 4 5 0.0000 0.0000 0.0000 0.4438 -0.2034 1.0000 40.3399 0.6000  
 0.3296 -0.3153 9.1227 1.0000 -0.1805 5.6864 1.0000 0.0000  
 5 5 96.1871 93.7006 68.6860 0.0955 -0.4781 1.0000 17.8574 0.6000  
 0.2723 -0.2373 9.7875 1.0000 -0.0950 6.4757 1.0000 0.0000  
 1 6 100.2834 27.9207 0.0000 0.1119 -0.5558 1.0000 17.2117 0.5923  
 0.9528 -0.2353 9.9655 1.0000 -0.1218 5.7788 1.0000 0.0000  
 2 6 235.5112 0.0000 0.0000 -0.7467 0.0000 1.0000 6.0000 0.5536  
 19.6541 1.0000 0.0000 1.0000 -0.0438 6.8851 0.0000 0.0000  
 3 6 277.9031 21.9498 0.0000 -0.7494 -0.3000 1.0000 36.0000 0.7564  
 8.2632 -0.4502 23.7800 1.0000 -0.1377 7.1295 1.0000 0.0000  
 4 6 185.4488 39.2832 43.3991 -0.1922 -0.3000 1.0000 36.0000 0.8217  
 0.8538 -0.3887 4.4334 1.0000 -0.5241 4.4529 1.0000 0.0000  
 6 6 90.1889 47.8775 30.0000 0.6567 -0.3000 1.0000 16.0000 0.0147  
 0.3287 -0.1777 4.6512 1.0000 -0.0592 7.7781 0.0000 0.0000  
 12 ! Nr of off-diagonal terms; Ediss;Ro;gamma;rsigma;rpi;rpi2  
 1 2 0.0464 1.8296 9.9214 1.0029 -1.0000 -1.0000  
 2 3 0.0403 1.6913 10.4801 0.8774 -1.0000 -1.0000  
 2 4 0.0524 1.7325 10.1306 0.9982 -1.0000 -1.0000  
 1 3 0.1028 1.9277 9.1521 1.3399 1.1104 1.1609  
 1 4 0.2070 1.7366 9.5916 1.2960 1.2008 1.1262  
 3 4 0.0491 1.7025 10.6101 1.3036 1.1276 1.0173  
 1 6 0.1295 1.6787 11.0825 1.7116 1.5500 -1.0000  
 2 6 0.0670 1.4906 12.7773 1.3322 -1.0055 -1.0000  
 3 6 0.1091 1.9544 11.1442 1.6740 1.3888 -1.0000  
 4 6 0.1365 1.9123 11.1784 -1.7095 -1.4858 -1.0000  
 1 5 0.1408 1.8161 9.9393 1.7986 1.3021 1.4031  
 2 5 0.0895 1.6239 10.0104 1.4640 -1.0000 -1.0000  
 82 ! Nr of angles;at1;at2;at3;Thetao,o;ka;kb;pv1;pv2  
 1 1 1 74.0317 32.2712 0.9501 0.0000 0.1780 10.5736 1.0400  
 1 1 2 70.6558 14.3658 5.3224 0.0000 0.0058 0.0000 1.0400  
 2 1 2 76.7339 14.4217 3.3631 0.0000 0.0127 0.0000 1.0400  
 1 2 2 0.0000 0.0000 6.0000 0.0000 0.0000 0.0000 1.0400  
 1 2 1 0.0000 3.4110 7.7350 0.0000 0.0000 0.0000 1.0400

|   |   |   |         |         |        |          |        |         |        |
|---|---|---|---------|---------|--------|----------|--------|---------|--------|
| 2 | 2 | 2 | 0.0000  | 27.9213 | 5.8635 | 0.0000   | 0.0000 | 0.0000  | 1.0400 |
| 1 | 1 | 3 | 65.1700 | 8.0170  | 7.5000 | 0.0000   | 0.2028 | 10.0000 | 1.0400 |
| 3 | 1 | 3 | 71.7582 | 26.7070 | 6.0466 | 0.0000   | 0.2000 | 0.0000  | 1.8525 |
| 1 | 1 | 4 | 65.4228 | 43.9870 | 1.5602 | 0.0000   | 0.2000 | 10.0000 | 1.8525 |
| 3 | 1 | 4 | 73.7046 | 23.8131 | 3.9811 | 0.0000   | 0.2000 | 0.0000  | 1.8525 |
| 4 | 1 | 4 | 65.6602 | 40.5852 | 1.8122 | 0.0000   | 0.2000 | 0.0000  | 1.8525 |
| 2 | 1 | 3 | 56.4426 | 17.6020 | 5.3044 | 0.0000   | 0.9699 | 0.0000  | 1.1272 |
| 2 | 1 | 4 | 71.0777 | 9.1462  | 3.4142 | 0.0000   | 0.9110 | 0.0000  | 1.0400 |
| 1 | 2 | 4 | 0.0000  | 0.0019  | 6.3000 | 0.0000   | 0.0000 | 0.0000  | 1.0400 |
| 1 | 3 | 1 | 72.1018 | 38.4720 | 1.3926 | 0.0000   | 0.4785 | 0.0000  | 1.2984 |
| 1 | 3 | 3 | 89.9987 | 44.9806 | 0.5818 | 0.0000   | 0.7472 | 0.0000  | 1.2639 |
| 1 | 3 | 4 | 70.3281 | 12.9371 | 7.5000 | 0.0000   | 0.7472 | 0.0000  | 1.2639 |
| 3 | 3 | 3 | 84.2807 | 24.1938 | 2.1695 | -10.0000 | 0.7472 | 0.0000  | 1.2639 |
| 3 | 3 | 4 | 84.2585 | 44.1039 | 0.9185 | 0.0000   | 0.7472 | 0.0000  | 1.2639 |
| 4 | 3 | 4 | 74.2312 | 25.7005 | 4.3943 | 0.0000   | 0.7472 | 0.0000  | 1.2639 |
| 1 | 3 | 2 | 89.0416 | 36.9460 | 0.4569 | 0.0000   | 2.7636 | 0.0000  | 2.0494 |
| 2 | 3 | 3 | 81.1709 | 4.2886  | 6.5904 | 0.0000   | 3.0000 | 0.0000  | 1.2618 |
| 2 | 3 | 4 | 75.9203 | 44.9675 | 0.8889 | 0.0000   | 3.0000 | 0.0000  | 1.2618 |
| 2 | 3 | 2 | 82.2020 | 12.7165 | 3.9296 | 0.0000   | 0.2765 | 0.0000  | 1.0470 |
| 1 | 4 | 1 | 68.3788 | 18.3716 | 1.8893 | 0.0000   | 2.4132 | 0.0000  | 1.3993 |
| 1 | 4 | 3 | 86.5585 | 37.6814 | 1.1611 | 0.0000   | 1.7325 | 0.0000  | 1.0440 |
| 1 | 4 | 4 | 74.4818 | 12.0954 | 7.5000 | 0.0000   | 1.7325 | 0.0000  | 1.0440 |
| 3 | 4 | 3 | 78.5850 | 44.3389 | 1.3239 | -26.2246 | 1.7325 | 40.0000 | 1.0440 |
| 3 | 4 | 4 | 77.6245 | 32.0866 | 1.8889 | -0.9193  | 1.7325 | 0.0000  | 1.0440 |
| 4 | 4 | 4 | 66.4718 | 15.9087 | 7.5000 | 0.0000   | 1.7325 | 0.0000  | 1.0440 |
| 1 | 4 | 2 | 90.0000 | 33.6636 | 1.1051 | 0.0000   | 0.2638 | 0.0000  | 1.1376 |
| 2 | 4 | 3 | 83.8493 | 44.9000 | 1.3580 | 0.0000   | 0.5355 | 0.0000  | 2.5279 |
| 2 | 4 | 4 | 78.7452 | 24.2010 | 3.7481 | 0.0000   | 0.5355 | 0.0000  | 2.5279 |
| 2 | 4 | 2 | 55.8679 | 14.2331 | 2.9225 | 0.0000   | 0.2000 | 0.0000  | 2.9932 |
| 1 | 2 | 3 | 0.0000  | 0.0019  | 6.0000 | 0.0000   | 0.0000 | 0.0000  | 1.0400 |
| 1 | 2 | 4 | 0.0000  | 0.0019  | 6.0000 | 0.0000   | 0.0000 | 0.0000  | 1.0400 |
| 1 | 2 | 5 | 0.0000  | 0.0019  | 6.0000 | 0.0000   | 0.0000 | 0.0000  | 1.0400 |
| 3 | 2 | 3 | 0.0000  | 0.0019  | 6.0000 | 0.0000   | 0.0000 | 0.0000  | 1.0400 |
| 3 | 2 | 4 | 0.0000  | 0.0019  | 6.0000 | 0.0000   | 0.0000 | 0.0000  | 1.0400 |

|   |   |   |         |         |        |        |        |        |        |
|---|---|---|---------|---------|--------|--------|--------|--------|--------|
| 4 | 2 | 4 | 0.0000  | 0.0019  | 6.0000 | 0.0000 | 0.0000 | 0.0000 | 1.0400 |
| 2 | 2 | 3 | 0.0000  | 0.0019  | 6.0000 | 0.0000 | 0.0000 | 0.0000 | 1.0400 |
| 2 | 2 | 4 | 0.0000  | 0.0019  | 6.0000 | 0.0000 | 0.0000 | 0.0000 | 1.0400 |
| 1 | 1 | 5 | 74.4180 | 33.4273 | 1.7018 | 0.1463 | 0.5000 | 0.0000 | 1.6178 |
| 1 | 5 | 1 | 79.7037 | 28.2036 | 1.7073 | 0.1463 | 0.5000 | 0.0000 | 1.6453 |
| 2 | 1 | 5 | 63.3289 | 29.4225 | 2.1326 | 0.0000 | 0.5000 | 0.0000 | 3.0000 |
| 1 | 5 | 2 | 85.9449 | 38.3109 | 1.2492 | 0.0000 | 0.5000 | 0.0000 | 1.1000 |
| 1 | 5 | 5 | 85.6645 | 40.0000 | 2.9274 | 0.1463 | 0.5000 | 0.0000 | 1.3830 |
| 2 | 5 | 2 | 83.8555 | 5.1317  | 0.4377 | 0.0000 | 0.5000 | 0.0000 | 3.0000 |
| 2 | 5 | 5 | 97.0064 | 32.1121 | 2.0242 | 0.0000 | 0.5000 | 0.0000 | 2.8568 |
| 6 | 6 | 6 | 76.2257 | 38.6984 | 0.8301 | 0.0000 | 0.0005 | 0.0000 | 1.3036 |
| 2 | 6 | 6 | 79.2712 | 10.2508 | 2.4946 | 0.0000 | 2.6950 | 0.0000 | 1.2160 |
| 2 | 6 | 2 | 77.4183 | 10.2268 | 4.0230 | 0.0000 | 3.2555 | 0.0000 | 1.0400 |
| 3 | 6 | 6 | 75.0505 | 22.1873 | 1.3013 | 0.0000 | 4.0000 | 0.0000 | 1.1770 |
| 2 | 6 | 3 | 64.2067 | 18.3649 | 4.0936 | 0.0000 | 3.4106 | 0.0000 | 1.0400 |
| 3 | 6 | 3 | 98.1116 | 32.8740 | 0.3463 | 0.0000 | 0.2200 | 0.0000 | 1.2221 |
| 6 | 3 | 6 | 55.8974 | 1.8196  | 0.3930 | 0.0000 | 2.7790 | 0.0000 | 1.0920 |
| 2 | 3 | 6 | 71.3545 | 4.4881  | 5.8566 | 0.0000 | 3.5827 | 0.0000 | 1.0900 |
| 3 | 3 | 6 | 68.4721 | 18.1831 | 2.3112 | 0.0000 | 1.1055 | 0.0000 | 1.0400 |
| 2 | 2 | 6 | 0.0000  | 47.1300 | 6.0000 | 0.0000 | 1.6371 | 0.0000 | 1.0400 |
| 6 | 2 | 6 | 0.0000  | 27.4206 | 6.0000 | 0.0000 | 1.6371 | 0.0000 | 1.0400 |
| 3 | 2 | 6 | 0.0000  | 7.0550  | 3.9236 | 0.0000 | 1.6371 | 0.0000 | 1.0400 |
| 2 | 2 | 5 | 0.0000  | 0.0019  | 6.0000 | 0.0000 | 0.0000 | 0.0000 | 1.0400 |
| 1 | 1 | 6 | 72.5239 | 22.3583 | 2.0393 | 0.0000 | 1.0031 | 0.0000 | 1.0400 |
| 1 | 6 | 1 | 68.7380 | 13.0736 | 7.7287 | 0.0000 | 1.0031 | 0.0000 | 1.0000 |
| 6 | 1 | 6 | 69.3369 | 18.9270 | 2.0703 | 0.0000 | 1.0031 | 0.0000 | 1.0400 |
| 1 | 6 | 6 | 69.3369 | 19.6964 | 2.0703 | 0.0000 | 1.0031 | 0.0000 | 1.0400 |
| 2 | 1 | 6 | 84.1550 | 32.8355 | 0.6419 | 0.0000 | 1.0000 | 0.0000 | 1.0000 |
| 1 | 6 | 2 | 72.5949 | 14.8347 | 2.4952 | 0.0000 | 1.0000 | 0.0000 | 1.0400 |
| 4 | 6 | 6 | 64.4297 | 13.1239 | 1.1830 | 0.0000 | 2.1459 | 0.0000 | 1.0400 |
| 4 | 6 | 4 | 78.4992 | 7.8594  | 2.3011 | 0.0000 | 0.7689 | 0.0000 | 1.0400 |
| 3 | 6 | 4 | 77.4641 | 4.5724  | 1.0849 | 0.0000 | 0.7689 | 0.0000 | 1.0400 |
| 6 | 4 | 6 | 25.5269 | 3.0725  | 0.2486 | 0.0000 | 4.1125 | 0.0000 | 1.0400 |
| 2 | 6 | 4 | 77.4079 | 16.0992 | 2.2665 | 0.0000 | 0.8613 | 0.0000 | 1.0400 |

2 4 6 74.6462 4.7671 1.6524 0.0000 1.6982 0.0000 1.0400  
 4 4 6 76.8202 12.7851 0.6196 0.0000 2.2466 0.0000 1.0400  
 3 4 6 69.8728 32.7155 1.5875 0.0000 2.2466 0.0000 1.0400  
 4 3 6 74.8601 21.1475 13.2496 0.0000 1.4170 0.0000 1.3151  
 4 2 6 0.0000 31.0427 4.5625 0.0000 1.6371 0.0000 1.0400  
 1 3 6 70.0000 12.0356 1.0943 0.0000 1.0000 0.0000 3.0000  
 1 6 3 97.8539 19.3628 1.9813 0.0000 1.0000 0.0000 1.7348  
 3 1 6 49.0987 14.0291 1.2540 0.0000 1.0000 0.0000 1.0000  
 1 2 6 0.0000 2.5000 1.0000 0.0000 1.0000 0.0000 1.2500  
 37 !Nr of torsions;at1;at2;at3;at4;;V1;V2;V3;V2(BO);vconj;n.u;n  
 1 1 1 1 0.0000 48.4194 0.3163 -8.6506 -1.7255 0.0000 0.0000  
 1 1 1 2 0.0000 63.3484 0.2210 -8.8401 -1.8081 0.0000 0.0000  
 2 1 1 2 0.0000 45.2741 0.4171 -6.9800 -1.2359 0.0000 0.0000  
 0 1 2 0 0.0000 0.0000 0.0000 0.0000 0.0000 0.0000 0.0000  
 0 2 2 0 0.0000 0.0000 0.0000 0.0000 0.0000 0.0000 0.0000  
 0 1 3 0 1.7254 86.0769 0.3440 -4.2330 -2.0000 0.0000 0.0000  
 0 2 3 0 0.0000 0.1000 0.0200 -2.5415 0.0000 0.0000 0.0000  
 0 3 3 0 1.2314 116.5137 0.5599 -4.1412 0.0000 0.0000 0.0000  
 0 1 4 0 -1.3258 149.8644 0.4790 -7.1541 -2.0000 0.0000 0.0000  
 0 2 4 0 0.0000 0.1000 0.0200 -2.5415 0.0000 0.0000 0.0000  
 0 3 4 0 1.3168 57.0732 0.2679 -4.1516 -2.0000 0.0000 0.0000  
 0 4 4 0 2.0000 75.3685 -0.7852 -9.0000 -2.0000 0.0000 0.0000  
 0 1 1 0 0.0930 18.6070 -1.3191 -9.0000 -1.0000 0.0000 0.0000  
 4 1 4 4 -2.0000 20.6655 -1.5000 -9.0000 -2.0000 0.0000 0.0000  
 0 1 5 0 4.0885 78.7058 0.1174 -2.1639 0.0000 0.0000 0.0000  
 0 5 5 0 -0.0170 -56.0786 0.6132 -2.2092 0.0000 0.0000 0.0000  
 0 2 5 0 0.0000 0.0000 0.0000 0.0000 0.0000 0.0000 0.0000  
 0 6 6 0 0.0000 0.0000 0.1200 -2.4426 0.0000 0.0000 0.0000  
 0 2 6 0 0.0000 0.0000 0.1200 -2.4847 0.0000 0.0000 0.0000  
 0 3 6 0 0.0000 0.0000 0.1200 -2.4703 0.0000 0.0000 0.0000  
 1 1 3 3 1.2707 21.6200 1.5000 -9.0000 -2.0000 0.0000 0.0000  
 1 3 3 1 -1.8804 79.9255 -1.5000 -4.1940 -2.0000 0.0000 0.0000  
 3 1 3 3 -2.0000 22.5092 1.5000 -8.9500 -2.0000 0.0000 0.0000  
 1 4 4 3 0.1040 70.1152 0.5284 -3.5026 -2.0000 0.0000 0.0000

|   |                                                  |   |   |         |          |         |         |         |        |        |
|---|--------------------------------------------------|---|---|---------|----------|---------|---------|---------|--------|--------|
| 1 | 1                                                | 3 | 4 | 1.5571  | 150.0000 | -1.5000 | -6.2992 | -2.0000 | 0.0000 | 0.0000 |
| 2 | 1                                                | 3 | 4 | -2.0000 | 156.6604 | 1.1004  | -7.3729 | -2.0000 | 0.0000 | 0.0000 |
| 1 | 3                                                | 4 | 3 | 2.0000  | 96.6281  | -1.5000 | -3.8076 | -2.0000 | 0.0000 | 0.0000 |
| 1 | 1                                                | 4 | 2 | -2.0000 | 147.2445 | -1.5000 | -7.0142 | -2.0000 | 0.0000 | 0.0000 |
| 1 | 1                                                | 4 | 3 | -2.0000 | 47.8326  | -1.5000 | -9.0000 | -2.0000 | 0.0000 | 0.0000 |
| 2 | 3                                                | 4 | 3 | -0.2997 | 152.9040 | -1.5000 | -4.4564 | -2.0000 | 0.0000 | 0.0000 |
| 2 | 4                                                | 4 | 3 | 0.1040  | 70.1152  | 0.5284  | -3.5026 | -2.0000 | 0.0000 | 0.0000 |
| 2 | 6                                                | 6 | 2 | 0.0000  | 0.0000   | 0.0640  | -2.4426 | 0.0000  | 0.0000 | 0.0000 |
| 2 | 6                                                | 6 | 6 | 0.0000  | 0.0000   | 0.1587  | -2.4426 | 0.0000  | 0.0000 | 0.0000 |
| 0 | 4                                                | 6 | 0 | 0.0000  | 0.0000   | 0.0000  | -2.4426 | 0.0000  | 0.0000 | 0.0000 |
| 6 | 1                                                | 3 | 4 | 2.2432  | 70.4121  | 0.7831  | -3.8898 | -2.0000 | 0.0000 | 0.0000 |
| 4 | 1                                                | 3 | 6 | -0.0199 | 98.6767  | 0.1000  | -4.2582 | -2.0000 | 0.0000 | 0.0000 |
| 3 | 1                                                | 3 | 6 | 0.9384  | 100.4942 | -1.2731 | -3.5147 | -2.0000 | 0.0000 | 0.0000 |
| 9 | ! Nr of hydrogen bonds;at1;at2;at3;Rhb;Dehb;vhb1 |   |   |         |          |         |         |         |        |        |
| 3 | 2                                                | 3 |   | 2.1845  | -2.3549  | 3.0582  | 19.1627 |         |        |        |
| 3 | 2                                                | 4 |   | 1.6658  | -3.8907  | 3.0582  | 19.1627 |         |        |        |
| 4 | 2                                                | 3 |   | 1.8738  | -3.5421  | 3.0582  | 19.1627 |         |        |        |
| 4 | 2                                                | 4 |   | 1.8075  | -4.1846  | 3.0582  | 19.1627 |         |        |        |
| 3 | 2                                                | 5 |   | 2.6644  | -3.0000  | 3.0000  | 3.0000  |         |        |        |
| 4 | 2                                                | 5 |   | 4.0476  | -3.0000  | 3.0000  | 3.0000  |         |        |        |
| 5 | 2                                                | 3 |   | 2.1126  | -4.5790  | 3.0000  | 3.0000  |         |        |        |
| 5 | 2                                                | 4 |   | 2.2066  | -5.7038  | 3.0000  | 3.0000  |         |        |        |
| 5 | 2                                                | 5 |   | 1.9461  | -4.0000  | 3.0000  | 3.0000  |         |        |        |
